# Supplementary material for: The first Korean genome sequence and analysis: Full genome sequencing for a socio-ethnic group
Source: HighWire-hosted journal article supplement (doi:10.1101/gr.092197.109), 2009-05-26
Supplement: Supplementary_Information.docx [file Supplementary_Information.docx]

**Supplementary Information**

**Donor information**

The genomic DNA used in this study came from a male Korean from Chuncheon, South Korea. He reports himself as a Korean, and his family lineage document shows that his family has been in Korea for more than 500 years (27 generations) without any known non-Korean genetic admixture. This is a document kept by each family in which family members are registered, generation by generation, not unlike a social security number system but for families.

**Disease risk prediction of non-synonymous SNPs**

Using the Polyphen (Polymorphism Phenotyping) program (Ramensky et al. 2002), we predicted the potential effects of non-synonymous SNPs on protein functions and structures. Among non-synonymous SNPs, 5998 (80.6%) were predicted as benign (i.e., having no effect), 907 (12.2%) as being possibly damaging, and 500 (6.7 %) as being probably damaging. In addition, SIFT (Sorting Intolerant From Tolerant) (Ng and Henikoff 2003) analysis showed that 6907 (78.7%) SNPs were predicted to be tolerated (i.e., no effect), and 1869 (21.3%) to be deleterious. To identify known phenotypes associated with SJK SNPs, we searched 3,439,107 alleles in the OMIM (Online Mendelian Inheritance in Man, ver. 18) (McKusick 2007), HGMD (Human Gene Mutation Data, ver. 7) (Stenson et al. 2008), and SNPedia (http://www.snpedia.com) databases. 257 alleles of 230 genes in HGMD, 299 alleles (homozygous: 137, heterozygous: 162) of 195 phenotypes in OMIM (homozygous: 106, heterozygous: 89), and 723 alleles of 211 phenotypes in SNPedia were identified in SJK (Supplemental Table 10).

**References**

McKusick, V.A. 2007. Mendelian Inheritance in Man and its online version, OMIM. *Am J Hum Genet* **80:** 588-604.

Ng, P.C. and Henikoff, S. 2003. SIFT: Predicting amino acid changes that affect protein function. *Nucleic Acids Res* **31:** 3812-3814.

Ramensky, V., Bork, P., and Sunyaev, S. 2002. Human non-synonymous SNPs: server and survey. *Nucleic Acids Res* **30:** 3894-3900.

Stenson, P.D., Ball, E., Howells, K., Phillips, A., Mort, M., and Cooper, D.N. 2008. Human Gene Mutation Database: towards a comprehensive central mutation database. *J Med Genet* **45:** 124-126.
