# Supplementary material for: The first Korean genome sequence and analysis: Full genome sequencing for a socio-ethnic group
Source: HighWire-hosted journal article supplement (doi:10.1101/gr.092197.109), 2009-05-26
Supplement: Table_S81.Genes_identified_in_SJK_mitochondria_genome.xlsx [file Table_S81.Genes_identified_in_SJK_mitochondria_genome.xlsx]

## Sheet: Sheet1
Table S8. Genes identified in SJK mitochondria genome.
gene name	start	stop	strand
HVS2	1	57
tRNA-Phe	579	649	plus
12s_rRNA	650	1603	plus
tRNA-Val	1604	1672	plus
16s_rRNA	1673	3230	plus
tRNA-Leu	3231	3305	plus
ND1	3308	4264	plus
tRNA-Ile	4264	4332	plus
tRNA-Gln	4330	4401	minus
tRNA-Met	4403	4470	plus
ND2	4471	5512	plus
tRNA-Trp	5513	5580	plus
tRNA-Ala	5588	5656	minus
tRNA-Asn	5658	5730	minus
tRNA-Cys	5762	5827	minus
tRNA-Tyr	5827	5892	minus
COX1	5905	7446	plus
tRNA-Ser	7446	7517	minus
tRNA-Asp	7519	7586	plus
COX2	7587	8270	plus
tRNA-Lys	8296	8365	plus
ATP8	8367	8573	plus
ATP6	8528	9208	plus
COX3	9208	9991	plus
tRNA-Gly	9992	10059	plus
ND3	10060	10405	plus
tRNA-Arg	10406	10470	plus
ND4L	10471	10767	plus
ND4	10761	12138	plus
tRNA-His	12139	12207	plus
tRNA-Ser2	12208	12266	plus
tRNA-Leu2	12267	12337	plus
ND5	12338	14149	plus
ND6	14150	14674	minus
tRNA-Glu	14675	14743	minus
CYTB	14748	15888	plus
tRNA-Thr	15889	15954	plus
tRNA-Pro	15956	16024	minus
HVS1	16025	16571
